# Supplementary material
Source: PubMed Central journal article supplement (PMC2879786)
Supplement: pp.109.151985_1.pdf [file pp.109.151985_1.pdf]

**A Comprehensive Toolkit of Plant Cell Wall Glycan-Directed Monoclonal Antibodies**

Sivakumar Pattathil, Utku Avci, David Baldwin, Alton G. Swennes, Janelle A. McGill, Zoë Popper, Tracey Bootten, Anatheia Albert, Ruth H. Davis, Chakravarthy Chennareddy, Ruihua Dong, Beth O'Shea, Ray Rossi, Christine Leoff, Glenn Freshour, Rajesh Narra, Malcolm O'Neil, William S. York, and Michael G. Hahn

**SUPPLEMENTAL MATERIALS**

## Supplemental Methods:

**Hierarchical clustering of mAbs.** This clustering analysis was tailored for comparison of the ELISA responses among the mAbs when tested against the panel of polysaccharides. A matrix of ELISA data was generated, with each row vector of this matrix consisting of the raw ELISA response vector for a particular mAb assayed against the set of polysaccharides. Each row vector was normalized to unit length and then a correlation matrix was generated by calculating the dot product of each pair of rows in the normalized data matrix. Thus, each element of the correlation matrix corresponds to the cosine of the arc (on the surface of a unit hypersphere) connecting two of the normalized row vectors in the data matrix. A distance matrix was generated based on the arccosines of the elements of the correlation matrix. Hierarchical clustering was performed by calling the R function `hclust` using this distance matrix as its argument to generate a cluster matrix, which was used to generate a mAb dendrogram. A similar process was used to generate a polysaccharide dendrogram, using the columns of the normalized data matrix as the initial input. The R `heatmap` function was modified and used to create a heat map, using the two dendrograms and the initial data matrix as inputs (Figure 2).

To compare experimental replicates of the ELISA data sets, “data correlation heat maps” were generated. Two raw data matrices (one for the reference data set and one for the test data set) were generated as described above. The rows of the reference matrix were clustered and a dendrogram of mAb ELISA response patterns was generated as described above. Then, a different kind of correlation matrix, in which each element consists of the dot product of a row vector in the test matrix with a row vector in the reference matrix, was generated (Figure 1). This correlation matrix was plotted using a modification of the R `heatmap` function with the mAb dendrogram for the reference data set and the correlation matrix as input arguments. In this heat map, the order of rows (mAbs in the reference matrix) and columns (mAbs in the test matrix) is the same, both being based on the dendrogram generated by clustering rows of ELISA data in the reference matrix. Each cell on the diagonal of this heat map (*i.e.*, each element on the diagonal of the correlation matrix) thus corresponds to the correlation of two independent experimental measurements of the ELISA response pattern for a particular mAb. Each off-diagonal element in the correlation matrix corresponds to the correlation of the ELISA response pattern for a mAb (*i.e.*, row vector *i* from one experiment) with the ELISA response pattern for another mAb (row vector *j* from another experiment). Perfectly reproducible data corresponds to

the situation where response vectors  $i$  and  $j$  in the reference matrix are equal to the corresponding response vectors in the test matrix. This would result in a correlation matrix (heat map) in which all diagonal elements have a value of one. This matrix would also be symmetrical about the diagonal, as the correlation of row vector  $i$  in the reference matrix with row vector  $j$  in the test matrix would be equal to the correlation of row vector  $j$  in the reference matrix with row vector  $i$  in the test matrix.

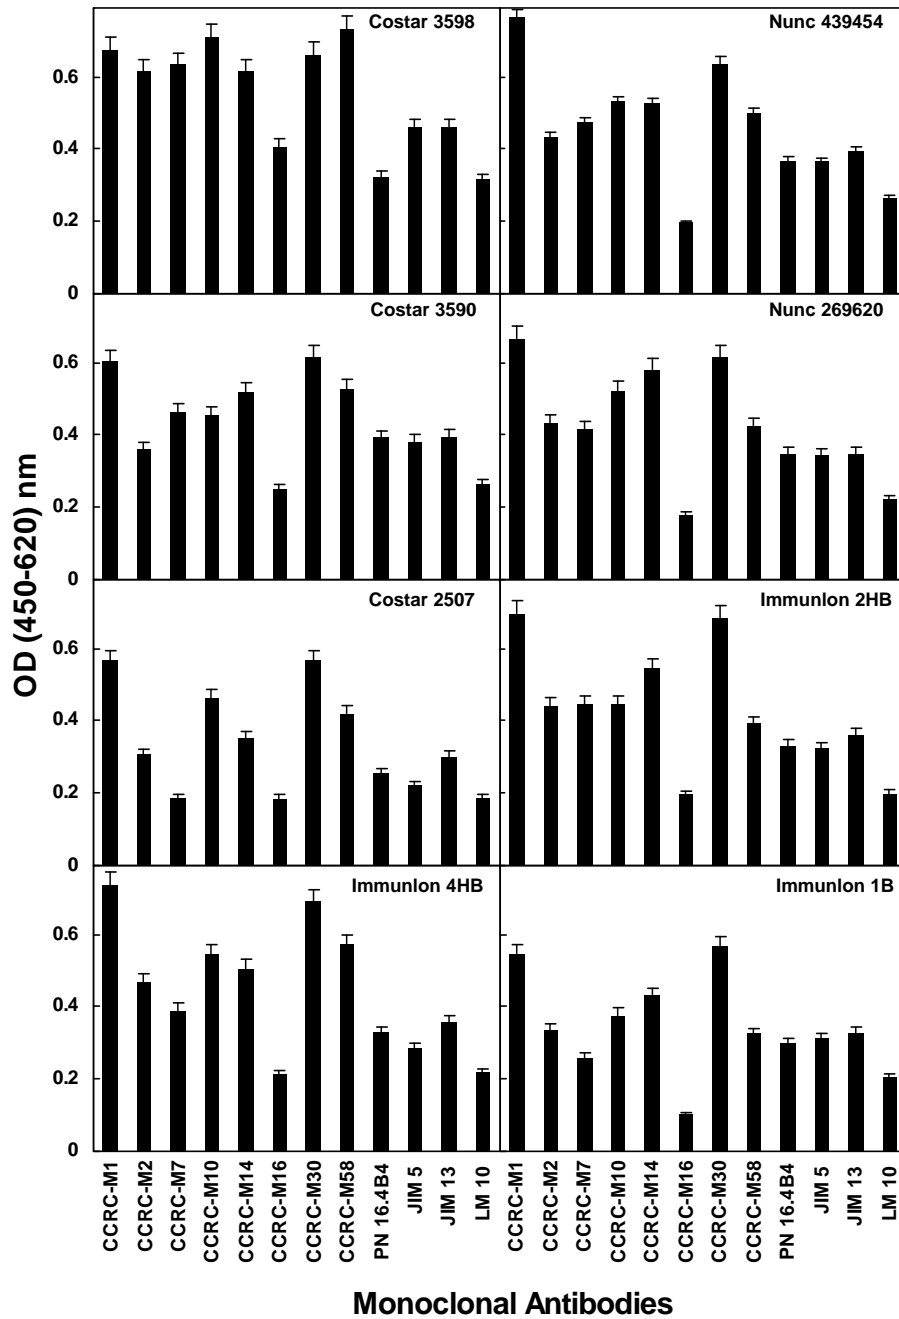

**Figure S1. Suitability of 96-well plates for polysaccharide ELISAs.**

Twelve mAb/polysaccharide pairs (see Materials and Methods) were tested on eight commercially available 96-well plates to determine which plates are best suited for immobilization of wall polysaccharides and subsequent ELISAs. Bars indicate the OD value given by each mAb when tested in the ELISA against a polysaccharide that mAb is known to recognize.

**Table S1: Plant polysaccharide preparations used in this study.**

Polysaccharide preparations are grouped with respect to the predominant glycan component. Information is provided as to the plant origin of the preparation, abbreviation used in the paper, source and sugar composition.

| Polysaccharide class | Preparation (Abbreviation)                                   | Source and reference(s)/website for structural studies                                                                                                                                | Sugar composition (Mol %)                                            |
|----------------------|--------------------------------------------------------------|---------------------------------------------------------------------------------------------------------------------------------------------------------------------------------------|----------------------------------------------------------------------|
| XGs                  | Tamarind Xyloglucan (Tam XG)                                 | CCRC, UGA; (York et al., 1993), Hahn lab data (unpublished)                                                                                                                           | Glc (43), Xyl (37), Gal (17) and Ara (3)                             |
|                      | Tomato Xyloglucan (Tom XG)                                   | CCRC, UGA; (Jia et al., 2003), Hahn lab data (unpublished)                                                                                                                            | Glc (44), Xyl (32), Gal (14) and Ara (10)                            |
|                      | Sycamore Maple Xyloglucan (Syc XG)                           | CCRC, UGA; (Stevenson et al., 1986), Hahn lab data (unpublished)                                                                                                                      | Glc (42), Xyl (31), Gal (10), Man (9), Fuc (4) and Ara (4)           |
| Xylans               | Wheat Arabinoxylan (Wh Ara Xyl)                              | Megazyme, Bray, Ireland; Hahn lab data (unpublished), <a href="http://secure.megazyme.com/downloads/en/data/P-WAXYL.pdf">http://secure.megazyme.com/downloads/en/data/P-WAXYL.pdf</a> | Ara (37), Xyl (61) and traces of other sugars                        |
|                      | 4-O-Methylglucuronoxylan (MeGLA Xyl)                         | Sigma-Aldrich, St. Louis, MO; Hahn lab data (unpublished)                                                                                                                             | Xyl (82.8) and Methyl GlcA (17.2)                                    |
|                      | Birch Wood Xylan (BW Xyl)                                    | Sigma-Aldrich, St. Louis, MO; Hahn lab data (unpublished)                                                                                                                             | Xyl (100)                                                            |
|                      | <i>Phormium tenax</i> Partially Hydrolysed Xylan (PT Xyl PH) | IRL, New Zealand; Hahn lab data (unpublished)                                                                                                                                         | Xyl (94) and Gluc (6)                                                |
|                      | <i>Phormium tenax</i> Low Arabinose Xylan (PT Xyl LA)        | IRL, New Zealand; Hahn lab data (unpublished)                                                                                                                                         | Xyl (87), Ara (8) and Glc (5)                                        |
|                      | <i>Phormium cookianum</i> High Arabinose Xylan (PC Xyl)      | IRL, New Zealand; Hahn lab data (unpublished)                                                                                                                                         | Xyl (70), Ara (27) and Glc (3)                                       |
|                      | Corn Xylan (Corn Xyl)                                        | National Renewable Energy Lab, Golden, CO; Hahn lab data (unpublished)                                                                                                                | Xyl (100)                                                            |
|                      | Poplar Xylan (Pop Xyl)                                       | National Renewable Energy Lab, Golden, CO; Hahn lab data (unpublished)                                                                                                                | Xyl (94), GalA (4) and Rha (2)                                       |
|                      | Eucalyptus KOHss (Eucal KOH)                                 | Dr. Henk Schols, Laboratory of Food Chemistry, Wageningen, The Netherlands; personal communication                                                                                    | Xyl (81), UA (13), Gal (3), Rha (2), Ara (1), Glc (1) and Man (1)    |
|                      | Sorghum BE1 (Sorg BE1)                                       | Dr. Henk Schols, Laboratory of Food Chemistry, Wageningen, The Netherlands; personal communication                                                                                    | Ara (45.8), Xyl (40.9), UA (9.8), Gal (1.8), Glc (1.7) and Man (0.2) |
|                      | Corn BE1 (Corn BE1)                                          | Dr. Henk Schols, Laboratory of Food Chemistry, Wageningen, The Netherlands; personal communication                                                                                    | Ara (38.4), Xyl (48.3), UA (8.3), Gal (4.3), Glc (0.7) and Man (0.1) |
| Mannans              | Tomato Glucomannan (Tom Gluc Man)                            | CCRC, UGA; Hahn lab data (unpublished)                                                                                                                                                | Glc (61) and Man (39)                                                |
|                      | Guar Galactomannan (Guar Gal Man)                            | Megazyme, Bray, Ireland; Hahn lab data (unpublished), <a href="http://secure.megazyme.com/downloads/en/data/P-GGMMV.pdf">http://secure.megazyme.com/downloads/en/data/P-GGMMV.pdf</a> | Man (62) and Gal (38)                                                |
|                      | Gum Guar (Gum Guar)                                          | Sigma-Aldrich, St. Louis, MO; Hahn lab data (unpublished)                                                                                                                             | Man (63), Gal (36) and Ara (1)                                       |
|                      | Locust Bean Gum (Loc Bean Gum)                               | Sigma-Aldrich, St. Louis, MO; Hahn lab data (unpublished)                                                                                                                             | Man (81) and Gal (19)                                                |

|           |                                                               |                                                                                                                                                                                         |                                                                                                         |
|-----------|---------------------------------------------------------------|-----------------------------------------------------------------------------------------------------------------------------------------------------------------------------------------|---------------------------------------------------------------------------------------------------------|
| β-Glucans | (1→3)(1→4)-β-Glucan (1314 Gluc)                               | Megazyme, Bray, Ireland; Hahn lab data (unpublished); Hahn lab data (unpublished)                                                                                                       | Glc (97), Man (2) and Ara (1)                                                                           |
|           | (1→3)(1→6)-β-Glucan (1316 Gluc)                               | CCRC, UGA; (Hahn et al., 1992), Hahn lab data (unpublished)                                                                                                                             | Glc (91), Man (7) and Ara (2)                                                                           |
|           | Pachyman (Pachyman)                                           | Megazyme, Bray, Ireland; Hahn lab data (unpublished), <a href="http://secure.megazyme.com/downloads/en/data/P-PACHY.pdf">http://secure.megazyme.com/downloads/en/data/P-PACHY.pdf</a>   | D-glucose essentially all of which is 1,3-β-linked (>98)                                                |
|           | Lichenan (Lichenan)                                           | Megazyme, Bray, Ireland; Hahn lab data (unpublished), <a href="http://secure.megazyme.com/downloads/en/data/P-LICHN.pdf">http://secure.megazyme.com/downloads/en/data/P-LICHN.pdf</a>   | Glc (98) and Ara (2)                                                                                    |
| Galactans | Lupin Galactan (Lup Gal)                                      | Megazyme, Bray, Ireland; Hahn lab data (unpublished), <a href="http://secure.megazyme.com/downloads/en/data/P-GALLU.pdf">http://secure.megazyme.com/downloads/en/data/P-GALLU.pdf</a>   | Gal (83), GalA (5), Rha (5), Ara (3), Xyl (2) and traces of Glc                                         |
|           | Potato Galactan (Pot Gal)                                     | Megazyme, Bray, Ireland; Hahn lab data (unpublished), <a href="http://secure.megazyme.com/downloads/en/data/P-GALPOT.pdf">http://secure.megazyme.com/downloads/en/data/P-GALPOT.pdf</a> | Gal (88), GalA (6), Ara (3) and Rha (3)                                                                 |
| AGs       | Larch Arabinogalactan (Lar Ara Gal)                           | Megazyme, Bray, Ireland; Hahn lab data (unpublished), <a href="http://secure.megazyme.com/downloads/en/data/P-ARGAL.pdf">http://secure.megazyme.com/downloads/en/data/P-ARGAL.pdf</a>   | Gal (81), Ara (14) and traces of other sugars                                                           |
|           | Gum Arabic (Gum Arabic)                                       | Sigma-Aldrich, St. Louis, MO; (Stephen, Phillips, and Williams, 2006); Hahn lab data (unpublished)                                                                                      | Ara (37), Gal (40), Rha (20) and traces of Glc                                                          |
|           | Gum Ghatti (Gum Ghatti)                                       | Sigma-Aldrich, St. Louis, MO; (Stephen, Phillips, and Williams, 2006); Hahn lab data (unpublished)                                                                                      | Ara (49), Gal (31), Man (10), GlcA (8) and Xyl (2)                                                      |
|           | Gum Tragacanth (Gum Trag)                                     | Sigma-Aldrich, St. Louis, MO; (Stephen, Phillips, and Williams, 2006); Hahn lab data (unpublished)                                                                                      | Gal (32.3), Ara (31.7), Xyl (12), Glc (12.3), Fuc (8.4) and Rha (3.3)                                   |
|           | Arabinan (Sug Beet MGZ Branch Arab)                           | Megazyme, Bray, Ireland; Hahn lab data (unpublished), <a href="http://secure.megazyme.com/downloads/en/data/P-ARAB.pdf">http://secure.megazyme.com/downloads/en/data/P-ARAB.pdf</a>     | Ara (88), Gal (3), Rha (2) and GalA (7)                                                                 |
|           | Linear Arabinan (Sug Beet MGZ Lin Arab)                       | Megazyme, Bray, Ireland; Hahn lab data (unpublished), <a href="http://secure.megazyme.com/downloads/en/data/P-LARB.pdf">http://secure.megazyme.com/downloads/en/data/P-LARB.pdf</a>     | Ara (97.5), GalA (2), Gal (0.4) and Rha (0.1)                                                           |
|           | Sugar Beet Linear Arabinan (Sug Beet Lin Arab)                | Dr. Henk Schols, Laboratory of Food Chemistry, Wageningen, The Netherlands; personal communication                                                                                      | Ara (74), UA (14) and Gal (12)                                                                          |
|           | Sugar Beet Branched Arabinan (Sug Beet Branch Arab)           | Dr. Henk Schols, Laboratory of Food Chemistry, Wageningen, The Netherlands; personal communication                                                                                      | Ara (>80)                                                                                               |
|           | Potato Arabinogalactan (Pot Ara Gal)                          | Dr. Henk Schols, Laboratory of Food Chemistry, Wageningen, The Netherlands; personal communication                                                                                      | Gal (63), Ara (20) and UA (17)                                                                          |
|           | Arabinogalactan II (Ara Gal II)                               | Dr. Henk Schols, Laboratory of Food Chemistry, Wageningen, The Netherlands; personal communication                                                                                      | Gal (84) and Gal (16)                                                                                   |
| RG-I      | Sycamore Maple Pectic Polysaccharides (Syc PecP)              | CCRC, UGA; (Stevenson et al., 1986); Hahn lab data (unpublished)                                                                                                                        | Gal (52.4), GlcA (15), GalA (11), Xyl (7.9), Ara (7.5), Glc (2.6), Rha (2), Man (1.3) and traces of Fuc |
|           | Tomato Pectic Polysaccharides (Tom PecP)                      | CCRC, UGA; (Jia et al., 2003); Hahn lab data (unpublished)                                                                                                                              | Gal (57.4), Ara (25.2), GalA (6.5), Rha (4.4), Xyl (4.3) and Fuc (2.2)                                  |
|           | <i>Physcomitrella patens</i> Pectic Polysaccharides (PhysecP) | CCRC, UGA; (Peña et al., 2008)                                                                                                                                                          | GalA (46.7), Rha (24), Gal(17.4), Ara (8.1), Glc (2.3) and 1.5 (Xyl)                                    |
|           | Gum Karaya (Gum Karaya)                                       | Sigma-Aldrich, St. Louis, MO; Hahn lab data (unpublished)                                                                                                                               | GalA (57), GlcA (8), Gal (17), Rha (16) and traces of Glc                                               |
|           | Potato RG-I (Pot RG-I)                                        | Megazyme, Bray, Ireland; Hahn lab data (unpublished), <a href="http://secure.megazyme.com/downloads/en/data/P-RHAM1.pdf">http://secure.megazyme.com/downloads/en/data/P-RHAM1.pdf</a>   | GalA (51), Rha (28.6), Gal (14), Ara (5.4) and Xyl (1)                                                  |

|           |                                                            |                                                                                                                                                                                       |                                                                                                     |
|-----------|------------------------------------------------------------|---------------------------------------------------------------------------------------------------------------------------------------------------------------------------------------|-----------------------------------------------------------------------------------------------------|
|           | Soybean RG-I (Soy RG-I)                                    | Megazyme, Bray, Ireland; Hahn lab data (unpublished), <a href="http://secure.megazyme.com/downloads/en/data/P-RHAGN.pdf">http://secure.megazyme.com/downloads/en/data/P-RHAGN.pdf</a> | GalA (51), Xyl (13), Gal (11), Rha (10), Fuc (9) and Ara (6)                                        |
|           | <i>Arabidopsis thaliana</i> RG-I (At RG-I)                 | CCRC, UGA; (Zabackis et al., 1995)                                                                                                                                                    | GalA (34), Rha (27), Gal (17), Ara (14), Xyl (5), Fuc (1), GlcA (1) and GalA (1)                    |
|           | Green Tomato Fruit RG-I (GrTomFrRG-I)                      | CCRC, UGA; Hahn lab data (unpublished)                                                                                                                                                | GalA (49.5), Gal (43.8), Rha (4.7), GlcA (1), Ara (0.5) and traces of Xyl and Glc                   |
|           | Lettuce RGI (Let RG-I)                                     | CCRC, UGA; Hahn lab data (unpublished)                                                                                                                                                | Gal (54.9), GalA (23.4), Rha (6.9), GlcA (5.7), Ara (4.9) and Xyl (4.2)                             |
|           | RG-I from Okra (Okra RG-I)                                 | Dr. Henk Schols, Laboratory of Food Chemistry, Wageningen, The Netherlands; personal communication                                                                                    | Gal (53), GalA (26), Rha (14), GlcA (4), Glc (2.5) Ara (1) and Man (1)                              |
| Mucilages | <i>Arabidopsis thaliana</i> Seed Mucilage (At Seed Muc)    | CCRC, UGA; Hahn lab data (unpublished)                                                                                                                                                | Rha (69), GalA (27.7), Gal (1.8) and Xyl (1.5)                                                      |
|           | Sinapus Seed Mucilage (Sin Seed Muc)                       | CCRC, UGA; Hahn lab data (unpublished)                                                                                                                                                | GalA (57), Gal (19), Rha (12), GlcA (10) and traces of Man and Glc                                  |
|           | Peppergrass Seed Mucilage (Pep Gr S Muc)                   | CCRC, UGA; Hahn lab data (unpublished), (Deng et al., 2009)                                                                                                                           | GlcA (22.2), GalA (22.1), Gal (18.9), Xyl (9.8), Rha (8), Glc (7), Fuc (5.2), Ara (5) and Man (1.8) |
|           | Camelina Seed Mucilage (Cam Seed Muc)                      | CCRC, UGA; Hahn lab data (unpublished)                                                                                                                                                | Rha (57.1), GalA (24.4), Gal (13.3), Xyl (2.2), Ara (2.3) and Man (0.8)                             |
|           | Linseed Mucilage (Lin Seed Muc)                            | CCRC, UGA; Hahn lab data (unpublished)                                                                                                                                                | Rha (44.2), GalA (18.5), Xyl (15.8), Gal (11.1), Fuc (3), Ara (4.6) and Glc (2.9)                   |
| HG        | Citrus Pectin (Citrus Pect)                                | Hercules, Wilmington, DE; Hahn lab data (unpublished)                                                                                                                                 | GalA (85), Rha (13) and Gal (2)                                                                     |
|           | 73% Me Pectin (73%MePect)                                  | Hercules, Wilmington, DE; Hahn lab data (unpublished)                                                                                                                                 | GalA (81), Gal (7), Rha (6.5), Ara (4.6) and Glc (0.9)                                              |
|           | 55% Me Pectin (55%MePect)                                  | Hercules, Wilmington, DE; Hahn lab data (unpublished)                                                                                                                                 | GalA (81), Gal (10), Rha (9)                                                                        |
|           | 33% Me Pectin (33%MePect)                                  | Hercules, Wilmington, DE; Hahn lab data (unpublished)                                                                                                                                 | GalA (89), Gal (7), Rha (4)                                                                         |
|           | High-acetyl Sugar Beet $\beta$ -Pectin (HAc Sug Beet Pect) | Hercules, Wilmington, DE; Hahn lab data (unpublished)                                                                                                                                 | GalA (56.2), Rha (21.3), Gal (15) and Ara (7.5)                                                     |

**Table S2: Monoclonal antibodies included in this study.**

McAbs are grouped according to the major glycan recognized. The order of the antibodies within each group arises out of the hierarchical clustering analysis of the polysaccharide screening ELISA data (Figure 2). Information is provided for each McAb as to the immunogen used to generate the antibody, animal source, isotype (including light chain specifications) and references.

| Glycans            | Antibody                              | Immunogen                          | Animal           | Isotype           | References            |
|--------------------|---------------------------------------|------------------------------------|------------------|-------------------|-----------------------|
| Non-fucosylated XG | CCRC-M54                              | Tamarind Xyloglucan-BSA (covalent) | Mouse            | IgG1( $\lambda$ ) |                       |
|                    | CCRC-M48                              | Tamarind Xyloglucan-BSA (covalent) | Mouse            | IgG1( $\kappa$ )  |                       |
|                    | CCRC-M49                              | Tamarind Xyloglucan-BSA (covalent) | Mouse            | IgG1( $\lambda$ ) |                       |
|                    | CCRC-M96                              | Tomato Xyloglucan-BSA (covalent)   | Mouse            | IgG3( $\lambda$ ) |                       |
|                    | CCRC-M50                              | Tamarind Xyloglucan-BSA (covalent) | Mouse            | IgG1( $\lambda$ ) |                       |
|                    | CCRC-M51                              | Tamarind Xyloglucan-BSA (covalent) | Mouse            | IgG1( $\lambda$ ) |                       |
|                    | CCRC-M53                              | Tamarind Xyloglucan-BSA (covalent) | Mouse            | IgG1( $\lambda$ ) |                       |
|                    | LM15                                  | XXXG-BSA (covalent)                | Rat              | IgG2c( $\kappa$ ) | (Marcus et al., 2008) |
|                    | CCRC-M100                             | Sycamore Xyloglucan-BSA (covalent) | Mouse            | IgM( $\kappa$ )   |                       |
|                    | CCRC-M103                             | Sycamore Xyloglucan-BSA (covalent) | Mouse            | IgM( $\kappa$ )   |                       |
|                    | CCRC-M58                              | Tamarind Xyloglucan-BSA (covalent) | Mouse            | IgG1( $\kappa$ )  |                       |
|                    | CCRC-M86                              | Tomato Xyloglucan-BSA (covalent)   | Mouse            | IgM( $\kappa$ )   |                       |
|                    | CCRC-M55                              | Tamarind Xyloglucan-BSA (covalent) | Mouse            | IgG1( $\lambda$ ) |                       |
|                    | CCRC-M52                              | Tamarind Xyloglucan-BSA (covalent) | Mouse            | IgG1( $\lambda$ ) |                       |
|                    | CCRC-M99                              | Tomato Xyloglucan-BSA (covalent)   | Mouse            | IgG1( $\lambda$ ) |                       |
|                    | CCRC-M95                              | Tomato Xyloglucan-BSA (covalent)   | Mouse            | IgG1( $\lambda$ ) |                       |
|                    | CCRC-M101                             | Tomato Xyloglucan-BSA (covalent)   | Mouse            | IgG1( $\lambda$ ) |                       |
|                    | CCRC-M104                             | Tomato Xyloglucan-BSA (covalent)   | Mouse            | IgG1( $\lambda$ ) |                       |
|                    | CCRC-M89                              | Tomato Xyloglucan-BSA (covalent)   | Mouse            | IgG1( $\lambda$ ) |                       |
|                    | CCRC-M93                              | Tomato Xyloglucan-BSA (covalent)   | Mouse            | IgG1( $\lambda$ ) |                       |
|                    | CCRC-M87                              | Tomato Xyloglucan-BSA (covalent)   | Mouse            | IgG1( $\lambda$ ) |                       |
|                    | CCRC-M88                              | Tomato Xyloglucan-BSA (covalent)   | Mouse            | IgG1( $\lambda$ ) |                       |
|                    | CCRC-M57                              | Tamarind Xyloglucan-BSA (covalent) | Mouse            | IgG1( $\lambda$ ) |                       |
|                    | CCRC-M90                              | Tomato Xyloglucan-BSA (covalent)   | Mouse            | IgM( $\lambda$ )  |                       |
| CCRC-M47           | <i>Arabidopsis thaliana</i> Cell Wall | Mouse                              | IgM( $\lambda$ ) |                   |                       |



|                       |           |                                                           |       |                   |                            |
|-----------------------|-----------|-----------------------------------------------------------|-------|-------------------|----------------------------|
| Xylan-1               | CCRC-M111 | <i>Phormium tenax</i> xylan (low arabinose)/MeBSA         | Mouse | IgG1( $\lambda$ ) |                            |
|                       | CCRC-M108 | <i>Phormium tenax</i> xylan (low arabinose)/MeBSA         | Mouse | IgG1( $\lambda$ ) |                            |
|                       | CCRC-M109 | <i>Phormium tenax</i> xylan(low arabinose)/MeBSA          | Mouse | IgG1( $\lambda$ ) |                            |
| Fycosylated XG        | CCRC-M102 | Sycamore Xyloglucan-BSA (covalent)                        | Mouse | IgM( $\kappa$ )   |                            |
|                       | CCRC-M39  | 4-O-methylglucuronoxylan (Sigma)/MeBSA                    | Mouse | IgA( $\kappa$ )   |                            |
|                       | CCRC-M106 | Sycamore Xyloglucan-BSA (covalent)                        | Mouse | IgG1( $\kappa$ )  |                            |
|                       | CCRC-M84  | Sycamore Pectic Polysaccharides/MeBSA                     | Mouse | IgM( $\kappa$ )   |                            |
|                       | CCRC-M1   | Sycamore RG-I/MeBSA                                       | Mouse | IgG1( $\kappa$ )  | (Puhlmann et al., 1994)    |
| Undefined             | CCRC-M76  | Sycamore Pectic Polysaccharides/MeBSA                     | Mouse | IgG1( $\kappa$ )  |                            |
| Linseed Mucilage RG-I | JIM3      | Carrot Protoplasts                                        | Rat   | IgM( $\kappa$ )   | (K. Roberts, pers. comm.)  |
|                       | CCRC-M40  | <i>Arabidopsis thaliana</i> Cell Wall                     | Mouse | IgM( $\kappa$ )   |                            |
|                       | CCRC-M83  | <i>Arabidopsis thaliana</i> RG-II/MeBSA                   | Mouse | IgM( $\kappa$ )   |                            |
|                       | CCRC-M82  | <i>Arabidopsis thaliana</i> RG-II/MeBSA                   | Mouse | IgM( $\kappa$ )   |                            |
|                       | MH4.4E4   | Tobacco ( <i>Nicotiana tabacum</i> ) Leaf Protoplasts     | Mouse | IgM( $\kappa$ )   | (Hahn et al., 1987)        |
|                       | MH4.2A4   | Tobacco ( <i>Nicotiana tabacum</i> ) Leaf Protoplasts     | Mouse | IgM( $\kappa$ )   | (Hahn et al., 1987)        |
|                       | CCRC-M142 | Linseed Mucilage RGI/MeBSA                                | Mouse | IgM( $\kappa$ )   |                            |
|                       | CCRC-M141 | Linseed Mucilage RGI/MeBSA                                | Mouse | IgG2b( $\kappa$ ) |                            |
| Xylan-2               | CCRC-M119 | <i>Phormium cookianum</i> xylan (high arabinose)/MeBSA    | Mouse | IgM( $\kappa$ )   |                            |
|                       | CCRC-M115 | <i>Phormium cookianum</i> xylan (high arabinose)/MeBSA    | Mouse | IgG1( $\kappa$ )  |                            |
|                       | CCRC-M110 | <i>Phormium tenax</i> xylan (low arabinose)/MeBSA         | Mouse | IgG1( $\lambda$ ) |                            |
|                       | CCRC-M105 | <i>Phormium tenax</i> xylan (low arabinose)/MeBSA         | Mouse | IgA( $\kappa$ )   |                            |
|                       | CCRC-M117 | <i>Phormium cookianum</i> xylan (high arabinose)/MeBSA    | Mouse | IgG1( $\kappa$ )  |                            |
|                       | CCRC-M113 | <i>Phormium cookianum</i> xylan (high arabinose)/MeBSA    | Mouse | IgG1( $\kappa$ )  |                            |
|                       | CCRC-M120 | <i>Phormium cookianum</i> xylan (high arabinose)/MeBSA    | Mouse | IgM( $\kappa$ )   |                            |
|                       | CCRC-M118 | <i>Phormium cookianum</i> xylan (high arabinose)/MeBSA    | Mouse | IgM( $\kappa$ )   |                            |
|                       | CCRC-M116 | <i>Phormium tenax</i> xylan (low arabinose)/MeBSA         | Mouse | IgM( $\kappa$ )   |                            |
|                       | CCRC-M114 | <i>Phormium cookianum</i> xylan (high arabinose)/MeBSA    | Mouse | IgM( $\kappa$ )   |                            |
|                       | CCRC-M154 | Corn Stover Xylan-BSA (covalent)                          | Mouse | IgM( $\kappa$ )   |                            |
|                       | CCRC-M150 | Corn Stover Xylan-BSA (covalent)                          | Mouse | IgG3( $\kappa$ )  |                            |
| Undefined             | MAC265    | Infection Thread Matrix Glycoproteins                     | Rat   | IgG2a( $\kappa$ ) | (VandenBosch et al., 1989) |
|                       | CCRC-M97  | <i>Physcomitrella patens</i> Pectic Polysaccharides/MeBSA | Mouse | IgA( $\kappa$ )   |                            |

|                       |           |                                                           |       |                   |                           |
|-----------------------|-----------|-----------------------------------------------------------|-------|-------------------|---------------------------|
| Physcomitrella Pectin | CCRC-M98  | <i>Physcomitrella patens</i> Pectic Polysaccharides/MeBSA | Mouse | IgG1( $\kappa$ )  |                           |
|                       | CCRC-M94  | <i>Physcomitrella patens</i> Pectic Polysaccharides/MeBSA | Mouse | IgM( $\kappa$ )   |                           |
| RG-Ia                 | CCRC-M5   | Sycamore RG-I/MeBSA                                       | Mouse | IgG1( $\kappa$ )  | (Puhlmann et al., 1994)   |
|                       | CCRC-M2   | Sycamore RG-I/MeBSA                                       | Mouse | IgM( $\kappa$ )   | (Puhlmann et al., 1994)   |
| RG-Ib                 | CCRC-M23  | Wine RG-II-cBSA (covalent)                                | Mouse | IgG1( $\kappa$ )  |                           |
|                       | CCRC-M17  | Sycamore RG-II-cBSA (covalent)                            | Mouse | IgG1( $\kappa$ )  |                           |
|                       | CCRC-M19  | Sycamore RG-II-cBSA (covalent)                            | Mouse | IgM( $\kappa$ )   |                           |
|                       | CCRC-M18  | Sycamore RG-II-cBSA (covalent)                            | Mouse | IgG1( $\kappa$ )  |                           |
|                       | CCRC-M56  | Soybean RG-I (Megazyme)/MeBSA                             | Mouse | IgG1( $\kappa$ )  |                           |
|                       | CCRC-M16  | Sycamore RG-II-cBSA (covalent)                            | Mouse | IgG1( $\kappa$ )  |                           |
| RG-Ic                 | JIM137    | Feruloylated Sugarbeet Cell Wall Pectins                  | Rat   | IgM( $\kappa$ )   | (K. Roberts, pers. comm.) |
|                       | JIM101    | Liverwort ( <i>Gymnocolea inflata</i> ) AGP               | Rat   | IgM( $\kappa$ )   | (K. Roberts, pers. comm.) |
|                       | CCRC-M135 | <i>Camelina sativa</i> Seed Mucilage/MeBSA                | Mouse | IgA( $\kappa$ )   |                           |
|                       | CCRC-M61  | Sinapus Seed Mucilage/MeBSA                               | Mouse | IgM( $\kappa$ )   |                           |
|                       | CCRC-M30  | <i>Arabidopsis thaliana</i> Seed Mucilage/MeBSA           | Mouse | IgM( $\kappa$ )   |                           |
| Galactomannan         | CCRC-M75  | Guar Galactomannan (Megazyme)-BSA (covalent)              | Mouse | IgM( $\kappa$ )   |                           |
|                       | CCRC-M70  | Guar Galactomannan (Megazyme)-BSA (covalent)              | Mouse | IgM( $\kappa$ )   |                           |
|                       | CCRC-M74  | Guar Galactomannan (Megazyme)-BSA (covalent)              | Mouse | IgM( $\kappa$ )   |                           |
| $\beta$ -1,3 Glucan   | LAMP      | Laminarin-Haemocyanin (covalent)                          | Mouse | IgG1( $\kappa$ )  | (Meikle et al., 1991)     |
| AG-1                  | JIM93     | Pea Protoplast Membrane                                   | Rat   | IgG2c( $\kappa$ ) | (K. Roberts, pers. comm.) |
|                       | JIM94     | Pea Protoplast Membrane                                   | Rat   | IgG2c( $\kappa$ ) | (K. Roberts, pers. comm.) |
|                       | JIM11     | Carrot Cell Nuclear Matrix Protein Extract                | Rat   | IgG2c( $\kappa$ ) | (Smallwood et al., 1994)  |
|                       | MAC204    | Pea Peribacteroid Membrane                                | Mouse | IgM( $\kappa$ )   | (Bradley et al., 1988)    |
|                       | JIM20     | Pea Guard Cell Protoplasts                                | Rat   | IgM( $\kappa$ )   | (Smallwood et al., 1994)  |
| AG-2                  | LM6       | Arabinoheptaose-BSA (covalent)                            | Rat   | IgG2c( $\kappa$ ) | (Willats et al., 1998)    |
|                       | JIM14     | Carrot AGP2                                               | Rat   | IgM( $\kappa$ )   | (Knox et al., 1991)       |
|                       | MAC207    | Pea Peribacteroid Membrane                                | Mouse | IgM( $\kappa$ )   | (Bradley et al., 1988)    |
|                       | JIM19     | Pea Guard Cell Protoplasts                                | Rat   | IgM( $\kappa$ )   | (Wang et al., 1995)       |
|                       | JIM12     | Carrot Cell Nuclear Matrix Protein Extract                | Rat   | IgM( $\kappa$ )   | (Smallwood et al., 1994)  |
|                       | CCRC-M133 | Citrus Pectin/MeBSA                                       | Mouse | IgM( $\kappa$ )   |                           |
|                       | CCRC-M107 | <i>Arabidopsis thaliana</i> RG-II/MeBSA                   | Mouse | IgM( $\kappa$ )   |                           |
|                       | LM5       | Galactotetraose-BSA (covalent)                            | Rat   | IgG2c( $\kappa$ ) | (Jones et al., 1997)      |

|                 |           |                                                       |       |                   |                                                  |
|-----------------|-----------|-------------------------------------------------------|-------|-------------------|--------------------------------------------------|
| Undefined       | CCRC-M136 | Peppergrass Seed Mucilage/MeBSA                       | Mouse | IgG1( $\kappa$ )  |                                                  |
|                 | LM8       | Xylogalacturonan/MeBSA                                | Rat   | IgM( $\kappa$ )   | (Willats et al., 2004)                           |
| AG-3            | JIM4      | Carrot Protoplasts                                    | Rat   | IgM( $\kappa$ )   | (Knox and Roberts, 1989)                         |
|                 | CCRC-M31  | <i>Arabidopsis thaliana</i> Seed Mucilage/MeBSA       | Mouse | IgM( $\kappa$ )   |                                                  |
|                 | JIM17     | Carrot Extracellular Glycoproteins                    | Rat   | IgM( $\kappa$ )   | (K. Roberts, pers. comm.)                        |
|                 | LM1       | Rice Hydroxyproline-Rich Glycoproteins (Extensin)     | Rat   | IgM( $\kappa$ )   | (Smallwood et al., 1995)                         |
|                 | CCRC-M26  | Phytophthora Void Glucan-BSA (covalent)               | Mouse | IgA( $\kappa$ )   |                                                  |
|                 | JIM15     | Carrot AGP1                                           | Rat   | IgM( $\kappa$ )   | (Knox et al., 1991)                              |
|                 | JIM8      | Sugarbeet Suspension-Cultured Protoplasts             | Rat   | IgG2c( $\kappa$ ) | (Pennell et al., 1991)                           |
|                 | CCRC-M85  | Sycamore Pectic Polysaccharides/MeBSA                 | Mouse | IgM( $\kappa$ )   |                                                  |
|                 | CCRC-M81  | Sycamore Pectic Polysaccharides/MeBSA                 | Mouse | IgM( $\kappa$ )   |                                                  |
|                 | MAC266    | Golgi Glycoproteins                                   | Rat   | IgG2a( $\kappa$ ) | (Perotto et al., 1991)                           |
|                 | PN16.4B4  | Tobacco ( <i>Nicotiana glutinosa</i> ) Cell Membranes | Mouse | IgM( $\kappa$ )   | (Norman et al., 1986)                            |
| Pectic Backbone | CCRC-M132 | Peppergrass Seed Mucilage/MeBSA                       | Mouse | IgG1( $\kappa$ )  |                                                  |
|                 | CCRC-M131 | Peppergrass Seed Mucilage/MeBSA                       | Mouse | IgG1( $\kappa$ )  |                                                  |
|                 | CCRC-M38  | <i>Arabidopsis thaliana</i> Seed Mucilage/MeBSA       | Mouse | IgG1( $\kappa$ )  |                                                  |
|                 | JIM5      | Carrot Protoplasts                                    | Rat   | IgG2a( $\kappa$ ) | (Knox et al., 1990;<br>VandenBosch et al., 1989) |
|                 | PAM1      | Not applicable                                        | Human | not applicable    | (Willats et al., 1999)                           |
|                 | CCRC-M69  | Sinapus Seed Mucilage/MeBSA                           | Mouse | IgM( $\kappa$ )   |                                                  |
|                 | CCRC-M35  | <i>Arabidopsis thaliana</i> Seed Mucilage/MeBSA       | Mouse | IgM( $\kappa$ )   |                                                  |
|                 | CCRC-M36  | <i>Arabidopsis thaliana</i> Seed Mucilage/MeBSA       | Mouse | IgM( $\kappa$ )   |                                                  |
|                 | CCRC-M14  | Sycamore RG-I/MeBSA                                   | Mouse | IgM( $\kappa$ )   |                                                  |
|                 | CCRC-M129 | Citrus Pectin /MeBSA                                  | Mouse | IgG1( $\kappa$ )  |                                                  |
|                 | CCRC-M72  | Sinapus Seed Mucilage/MeBSA                           | Mouse | IgA( $\kappa$ )   |                                                  |
|                 | LM7       | Lime pectin                                           | Rat   | IgM( $\kappa$ )   | (Willats et al., 2001)                           |
|                 | CCRC-M34  | <i>Arabidopsis thaliana</i> Seed Mucilage/MeBSA       | Mouse | IgM( $\lambda$ )  |                                                  |
|                 | CCRC-M130 | Heat-treated Citrus Pectin                            | Mouse | IgG1( $\kappa$ )  |                                                  |
|                 | JIM136    | Feruloylated Sugarbeet Cell Wall Pectins              | Rat   | IgM( $\kappa$ )   | (K. Roberts, pers. comm.)                        |
|                 | JIM7      | Carrot Protoplasts                                    | Rat   | IgA( $\kappa$ )   | (Knox et al., 1990)                              |

|          |                                |                                                       |                  |                  |                           |
|----------|--------------------------------|-------------------------------------------------------|------------------|------------------|---------------------------|
| AG-4     | PN16.1B3                       | Tobacco ( <i>Nicotiana glutinosa</i> ) Cell Membranes | Mouse            | IgM( $\kappa$ )  | (Norman et al., 1986)     |
|          | CCRC-M124                      | RG-I pentamer-KLH (covalent)                          | Mouse            | IgG1( $\kappa$ ) |                           |
|          | JIM133                         | Zinnea Tracheary Element Cell Walls                   | Rat              | IgM( $\kappa$ )  | (K. Roberts, pers. comm.) |
|          | JIM13                          | Carrot AGP2                                           | Rat              | IgM( $\kappa$ )  | (Knox et al., 1991)       |
|          | LM2                            | Rice Arabinogalactan Proteins                         | Rat              | IgM( $\kappa$ )  | (Smallwood et al., 1996)  |
|          | CCRC-M92                       | Sycamore Pectic Polysaccharides/MeBSA                 | Mouse            | IgM( $\kappa$ )  |                           |
|          | CCRC-M91                       | Sycamore Pectic Polysaccharides/MeBSA                 | Mouse            | IgM( $\kappa$ )  |                           |
|          | CCRC-M78                       | <i>Arabidopsis thaliana</i> EPG RG-I/MeBSA            | Mouse            | IgM( $\kappa$ )  |                           |
| RG-I/AG  | CCRC-M60                       | Sinapus Seed Mucilage/MeBSA                           | Mouse            | IgM( $\kappa$ )  |                           |
|          | CCRC-M41                       | <i>Arabidopsis thaliana</i> Cell Wall                 | Mouse            | IgM( $\kappa$ )  |                           |
|          | CCRC-M80                       | <i>Arabidopsis thaliana</i> RG-II/MeBSA               | Mouse            | IgG1( $\kappa$ ) |                           |
|          | CCRC-M79                       | <i>Arabidopsis thaliana</i> EPG RG-I/MeBSA            | Mouse            | IgG1( $\kappa$ ) |                           |
|          | CCRC-M44                       | <i>Arabidopsis thaliana</i> Cell Wall                 | Mouse            | IgM( $\kappa$ )  |                           |
|          | CCRC-M33                       | <i>Arabidopsis thaliana</i> Seed Mucilage/MeBSA       | Mouse            | IgM( $\kappa$ )  |                           |
|          | CCRC-M32                       | <i>Arabidopsis thaliana</i> Seed Mucilage/MeBSA       | Mouse            | IgM( $\kappa$ )  |                           |
|          | CCRC-M13                       | Sycamore RG-I/MeBSA                                   | Mouse            | IgG1( $\kappa$ ) |                           |
|          | CCRC-M42                       | <i>Arabidopsis thaliana</i> Cell Wall                 | Mouse            | IgM( $\kappa$ )  |                           |
|          | CCRC-M24                       | Wine RG-II-cBSA (covalent)                            | Mouse            | IgM( $\kappa$ )  |                           |
|          | CCRC-M12                       | Sycamore RG-I/MeBSA                                   | Mouse            | IgG1( $\kappa$ ) | (Puhlmann et al., 1994)   |
|          | CCRC-M7                        | Sycamore RG-I/MeBSA                                   | Mouse            | IgG1( $\kappa$ ) | (Puhlmann et al., 1994)   |
|          | CCRC-M77                       | <i>Arabidopsis thaliana</i> EPG RG-I/MeBSA            | Mouse            | IgG1( $\kappa$ ) |                           |
|          | CCRC-M25                       | Wine RG-II-cBSA (covalent)                            | Mouse            | IgM( $\kappa$ )  |                           |
|          | CCRC-M9                        | Sycamore RG-I/MeBSA                                   | Mouse            | IgM( $\kappa$ )  |                           |
|          | CCRC-M128                      | Citrus Pectin /MeBSA                                  | Mouse            | IgM( $\kappa$ )  |                           |
|          | CCRC-M126                      | RG-I pentamer-KLH (covalent)                          | Mouse            | IgG3( $\kappa$ ) |                           |
|          | CCRC-M134                      | Citrus Pectin/MeBSA                                   | Mouse            | IgG3( $\kappa$ ) |                           |
|          | CCRC-M125                      | RG-I pentamer-KLH (covalent)                          | Mouse            | IgM( $\kappa$ )  |                           |
|          | CCRC-M123                      | RG-I pentamer-KLH (covalent)                          | Mouse            | IgG1( $\kappa$ ) |                           |
|          | CCRC-M122                      | RG-I pentamer-KLH (covalent)                          | Mouse            | IgG1( $\kappa$ ) |                           |
|          | CCRC-M121                      | RG-I pentamer-KLH (covalent)                          | Mouse            | IgG1( $\kappa$ ) |                           |
|          | CCRC-M112                      | <i>Arabidopsis thaliana</i> RG-II/MeBSA               | Mouse            | IgG3( $\kappa$ ) |                           |
| CCRC-M21 | Sycamore RG-I (0.4% Ara)/MeBSA | Mouse                                                 | IgG3( $\kappa$ ) |                  |                           |

|         |           |                                                       |       |                   |                           |
|---------|-----------|-------------------------------------------------------|-------|-------------------|---------------------------|
|         | JIM131    | Zinnea Tracheary Element Cell Walls                   | Rat   | IgG1( $\kappa$ )  | (K. Roberts, pers. comm.) |
|         | CCRC-M22  | Sycamore RG-I (0.4% Ara)/MeBSA                        | Mouse | IgG1( $\kappa$ )  |                           |
|         | JIM132    | Zinnea Tracheary Element Cell Walls                   | Rat   | IgM( $\kappa$ )   | (K. Roberts, pers. comm.) |
|         | JIM1      | Carrot Protoplasts                                    | Rat   | IgG2c( $\kappa$ ) | (K. Roberts, pers. comm.) |
|         | CCRC-M15  | Sycamore RG-I/MeBSA                                   | Mouse | IgM( $\kappa$ )   |                           |
|         | CCRC-M8   | Sycamore RG-I/MeBSA                                   | Mouse | IgM( $\kappa$ )   |                           |
|         | MH4.3E5   | Tobacco ( <i>Nicotiana tabacum</i> ) Leaf Protoplasts | Mouse | IgM( $\kappa$ )   | (Hahn et al., 1987)       |
|         | JIM16     | Carrot AGP1                                           | Rat   | IgM( $\kappa$ )   | (Knox et al., 1991)       |
| Xylan-3 | CCRC-M160 | Corn Cob Red-BSA (covalent)                           | Mouse | IgG1( $\kappa$ )  |                           |
|         | CCRC-M137 | Oat Xylan-BSA (covalent)                              | Mouse | IgM( $\kappa$ )   |                           |
|         | CCRC-M152 | Oat Xylan-BSA (covalent)                              | Mouse | IgM( $\kappa$ )   |                           |
|         | CCRC-M149 | Oat Xylan-BSA (covalent)                              | Mouse | IgM( $\kappa$ )   |                           |
|         | AX1       | Oligo-arabinoxylan-BSA (covalent)                     | Mouse | IgG1( $\lambda$ ) | (Guillon et al., 2004)    |
|         | CCRC-M144 | Corn Stover Xylan-BSA (covalent)                      | Mouse | IgG1( $\kappa$ )  |                           |
|         | CCRC-M143 | Corn Stover Xylan-BSA (covalent)                      | Mouse | IgG1( $\kappa$ )  |                           |
|         | CCRC-M146 | Corn Stover Xylan-BSA (covalent)                      | Mouse | IgG1( $\kappa$ )  |                           |
|         | CCRC-M145 | Corn Stover Xylan-BSA (covalent)                      | Mouse | IgG1( $\kappa$ )  |                           |
|         | CCRC-M155 | Corn Stover Xylan-BSA (covalent)                      | Mouse | IgG1( $\kappa$ )  |                           |
| Xylan-4 | CCRC-M153 | Oat Xylan-BSA (covalent)                              | Mouse | IgM( $\kappa$ )   |                           |
|         | CCRC-M151 | Oat Xylan-BSA (covalent)                              | Mouse | IgM( $\kappa$ )   |                           |
|         | CCRC-M157 | Oat Xylan-BSA (covalent)                              | Mouse | IgM( $\kappa$ )   |                           |
|         | CCRC-M148 | Oat Xylan-BSA (covalent)                              | Mouse | IgM( $\kappa$ )   |                           |
|         | CCRC-M156 | Oat Xylan-BSA (covalent)                              | Mouse | IgM( $\kappa$ )   |                           |
|         | CCRC-M140 | Oat Xylan-BSA (covalent)                              | Mouse | IgG1( $\kappa$ )  |                           |
|         | CCRC-M139 | Oat Xylan-BSA (covalent)                              | Mouse | IgG1( $\kappa$ )  |                           |
|         | CCRC-M159 | Oat Xylan-BSA (covalent)                              | Mouse | IgM( $\kappa$ )   |                           |
|         | CCRC-M138 | Oat Xylan-BSA (covalent)                              | Mouse | IgM( $\kappa$ )   |                           |
|         | CCRC-M147 | Oat Xylan-BSA (covalent)                              | Mouse | IgM( $\kappa$ )   |                           |
|         | LM10      | Xylopentaose-BSA (covalent)                           | Rat   | IgG2c( $\kappa$ ) | (McCartney et al., 2005)  |
|         | CCRC-M158 | Oat Xylan-BSA (covalent)                              | Mouse | IgM( $\kappa$ )   |                           |
|         | LM11      | Xylopentaose-BSA (covalent)                           | Rat   | IgM( $\kappa$ )   | (McCartney et al., 2005)  |

**Table S3: Coefficients correlating the ELISA responses obtained in one experiment with the averages of ELISA responses from six experiments.**

Correlation coefficients were calculated as the dot product of the normalized data vectors.

| <b>mAb</b> | <b>Correlation Coefficient</b> |
|------------|--------------------------------|
| CCRC-M30   | 0.923                          |
| CCRC-M56   | 0.986                          |
| CCRC-M16   | 1.000                          |
| CCRC-M2    | 0.998                          |
| CCRC-M1    | 1.000                          |
| CCRC-M31   | 0.998                          |
| CCRC-JIM3  | 1.000                          |
| CCRC-M24   | 0.985                          |
| CCRC-M7    | 1.000                          |
| CCRC-M21   | 0.999                          |
| CCRC-M13   | 0.999                          |
| CCRC-M32   | 0.999                          |
| CCRC-M42   | 0.999                          |
| CCRC-M60   | 0.994                          |
| CCRC-M77   | 0.999                          |
| CCRC-M33   | 1.000                          |
| CCRC-M9    | 0.999                          |
| CCRC-M79   | 0.998                          |
| JIM16      | 1.000                          |
| JIM1       | 1.000                          |
| JIM14      | 1.000                          |
| JIM4       | 0.997                          |
| JIM17      | 0.997                          |
| JIM8       | 0.997                          |
| JIM15      | 0.999                          |
| CCRC-M78   | 0.999                          |
| JIM13      | 0.999                          |
| JIM7       | 0.999                          |
| JIM136     | 0.998                          |
| CCRC-M34   | 0.987                          |
| LM7        | 0.991                          |
| CCRC-M38   | 0.999                          |
| JIM5       | 0.999                          |
| PAM1       | 0.980                          |
| CCRC-M35   | 1.000                          |
| CCRC-M14   | 0.998                          |
| CCRC-M36   | 0.999                          |
| JIM19      | 0.999                          |
| JIM12      | 1.000                          |
| JIM11      | 1.000                          |
| JIM20      | 1.000                          |

LITERATURE CITED

- Stephen AM, Phillips GO, Williams PA** eds, (2006) Food Polysaccharides and Their Applications. CRC Press, Boca Raton, FL, pp 1-733
- Bradley DJ, Wood EA, Larkins AP, Galfre G, Butcher GW, Brewin NJ** (1988) Isolation of monoclonal antibodies reacting with peribacteroid membranes and other components of pea root nodules containing *Rhizobium leguminosarum*. *Planta* **173**: 149-160
- Deng C, O'Neill MA, Hahn MG, York WS** (2009) Improved procedures for the selective chemical fragmentation of rhamnogalacturonans. *Carbohydr Res* **344**: 1852-1857
- Guillon F, Tranquet O, Quillien L, Utile JP, Ortiz JJO, Saulnier L** (2004) Generation of polyclonal and monoclonal antibodies against arabinoxylans and their use for immunocytochemical location of arabinoxylans in cell walls of endosperm of wheat. *J Cereal Sci* **40**: 167-182
- Hahn MG, Darvill A, Albersheim P, Bergmann C, Cheong J-J, Koller A, Lò V-M** (1992) Preparation and characterization of oligosaccharide elicitors of phytoalexin accumulation. *In* S Gurr, M McPherson, DJ Bowles, eds, *Molecular Plant Pathology (Volume II): A Practical Approach*, Oxford University Press, Oxford, UK, pp 103-147
- Hahn MG, Lerner DR, Fitter MS, Norman PM, Lamb CJ** (1987) Characterization of monoclonal antibodies to protoplast membranes of *Nicotiana tabacum* identified by an enzyme-linked immunosorbent assay. *Planta* **171**: 453-465
- Jia ZH, Qin Q, Darvill AG, York WS** (2003) Structure of the xyloglucan produced by suspension-cultured tomato cells. *Carbohydr Res* **338**: 1197-1208
- Jones L, Seymour GB, Knox JP** (1997) Localization of pectic galactan in tomato cell walls using a monoclonal antibody specific to (1→4)-β-D-galactan. *Plant Physiol* **113**: 1405-1412
- Knox JP, Linstead PJ, King J, Cooper C, Roberts K** (1990) Pectin esterification is spatially regulated both within cell walls and between developing tissues of root apices. *Planta* **181**: 512-521
- Knox JP, Linstead PJ, Peart J, Cooper C, Roberts K** (1991) Developmentally regulated epitopes of cell surface arabinogalactan proteins and their relation to root tissue pattern formation. *Plant J* **1**: 317-326

- Knox JP, Roberts K** (1989) Carbohydrate antigens and lectin receptors of the plasma membrane of carrot cells. *Protoplasma* **152**: 123-129
- Marcus SE, Verherbruggen Y, Herve C, Ordaz-Ortiz JJ, Farkas V, Pedersen HL, Willats WGT, Knox JP** (2008) Pectic homogalacturonan masks abundant sets of xyloglucan epitopes in plant cell walls. *BMC Plant Biology* **8**: 60-71
- McCartney L, Marcus SE, Knox JP** (2005) Monoclonal antibodies to plant cell wall xylans and arabinoxylans. *J Histochem Cytochem* **53**: 543-546
- Meikle PJ, Bonig I, Hoogenraad NJ, Clarke AE, Stone BA** (1991) The location of (1→3)- $\beta$ -glucans in the walls of pollen tubes of *Nicotiana alata* using a (1→3)- $\beta$ -glucan-specific monoclonal antibody. *Planta* **185**: 1-8
- Norman PM, Wingate VPM, Fitter MS, Lamb CJ** (1986) Monoclonal antibodies to plant plasma-membrane antigens. *Planta* **167**: 452-459
- Peña MJ, Darvill AG, Eberhard S, York WS, O'Neill MA** (2008) Moss and liverwort xyloglucans contain galacturonic acid and are structurally distinct from the xyloglucans synthesized by hornworts and vascular plants. *Glycobiology* **18**: 891-904
- Pennell RI, Janniche L, Kjellbom P, Scofield GN, Peart JM, Roberts K** (1991) Developmental regulation of a plasma membrane arabinogalactan protein epitope in oilseed rape flowers. *Plant Cell* **3**: 1317-1326
- Perotto S, VandenBosch KA, Butcher GW, Brewin NJ** (1991) Molecular composition and development of the plant glycocalyx associated with the peribacteroid membrane of pea root nodules. *Development* **112**: 763-773
- Puhlmann J, Bucheli E, Swain MJ, Dunning N, Albersheim P, Darvill AG, Hahn MG** (1994) Generation of monoclonal antibodies against plant cell wall polysaccharides. I. Characterization of a monoclonal antibody to a terminal  $\alpha$ -(1→2)-linked fucosyl-containing epitope. *Plant Physiol* **104**: 699-710
- Smallwood M, Beven A, Donovan N, Neill SJ, Peart J, Roberts K, Knox JP** (1994) Localization of cell wall proteins in relation to the developmental anatomy of the carrot root apex. *Plant J* **5**: 237-246
- Smallwood M, Martin H, Knox JP** (1995) An epitope of rice threonine- and hydroxyproline-rich glycoprotein is common to cell wall and hydrophobic plasma-membrane glycoproteins. *Planta* **196**: 510-522



- Smallwood M, Yates EA, Willats WGT, Martin H, Knox JP** (1996) Immunochemical comparison of membrane-associated and secreted arabinogalactan-proteins in rice and carrot. *Planta* **198**: 452-459
- Stevenson TT, McNeil M, Darvill AG, Albersheim P** (1986) Structure of plant cell walls. XVIII. An analysis of the extracellular polysaccharides of suspension-cultured sycamore cells. *Plant Physiol* **80**: 1012-1019
- VandenBosch KA, Bradley DJ, Knox JP, Perotto S, Butcher GW, Brewin NJ** (1989) Common components of the infection thread matrix and the intercellular space identified by immunocytochemical analysis of pea nodules and uninfected roots. *EMBO J* **8**: 335-342
- Wang M, Heimovaara-Dijkstra S, Van der Meulen RM, Knox JP, Neill SJ** (1995) The monoclonal antibody JIM19 modulates abscisic acid action in barley aleurone protoplasts. *Planta* **196**: 271-276
- Willats WGT, Gilmartin PM, Dalgaard Mikkelsen J, Knox JP** (1999) Cell wall antibodies without immunization: generation and use of de-esterified homogalacturonan block-specific antibodies from a naive phage display library. *Plant J* **18**: 57-65
- Willats WGT, Marcus SE, Knox JP** (1998) Generation of a monoclonal antibody specific to (1→5)- $\alpha$ -L-arabinan. *Carbohydr Res* **308**: 149-152
- Willats WGT, McCartney L, Steele-King CG, Marcus SE, Mort A, Huisman M, Van Alebeek G-J, Schols HA, Voragen AGJ, Le Goff A, Bonnin E, Thibault J-F, Knox JP** (2004) A xylogalacturonan epitope is specifically associated with plant cell detachment. *Planta* **218**: 673-681
- Willats WGT, Orfila C, Limberg G, Buchholt HC, Van Alebeek G-JWM, Voragen AGJ, Marcus SE, Christensen TMIE, Mikkelsen JD, Murray BS, Knox JP** (2001) Modulation of the degree and pattern of methyl-esterification of pectic homogalacturonan in plant cell walls - Implications for pectin methyl esterase action, matrix properties, and cell adhesion. *J Biol Chem* **276**: 19404-19413
- York WS, Harvey LK, Guillen R, Albersheim P, Darvill AG** (1993) Structural analysis of tamarind seed xyloglucan oligosaccharides using  $\beta$ -galactosidase digestion and spectroscopic methods. *Carbohydr Res* **248**: 285-301
- Zablackis E, Huang J, Müller B, Darvill AG, Albersheim P** (1995) Characterization of the cell wall polysaccharides of *Arabidopsis thaliana* leaves. *Plant Physiol* **107**: 1129-1138
